# Supplementary material
Source: publisher figshare collection journal article supplement (https://tandf.figshare.com/ndownloader/files/14065796)

Appendix 1. The T-PEMF device.


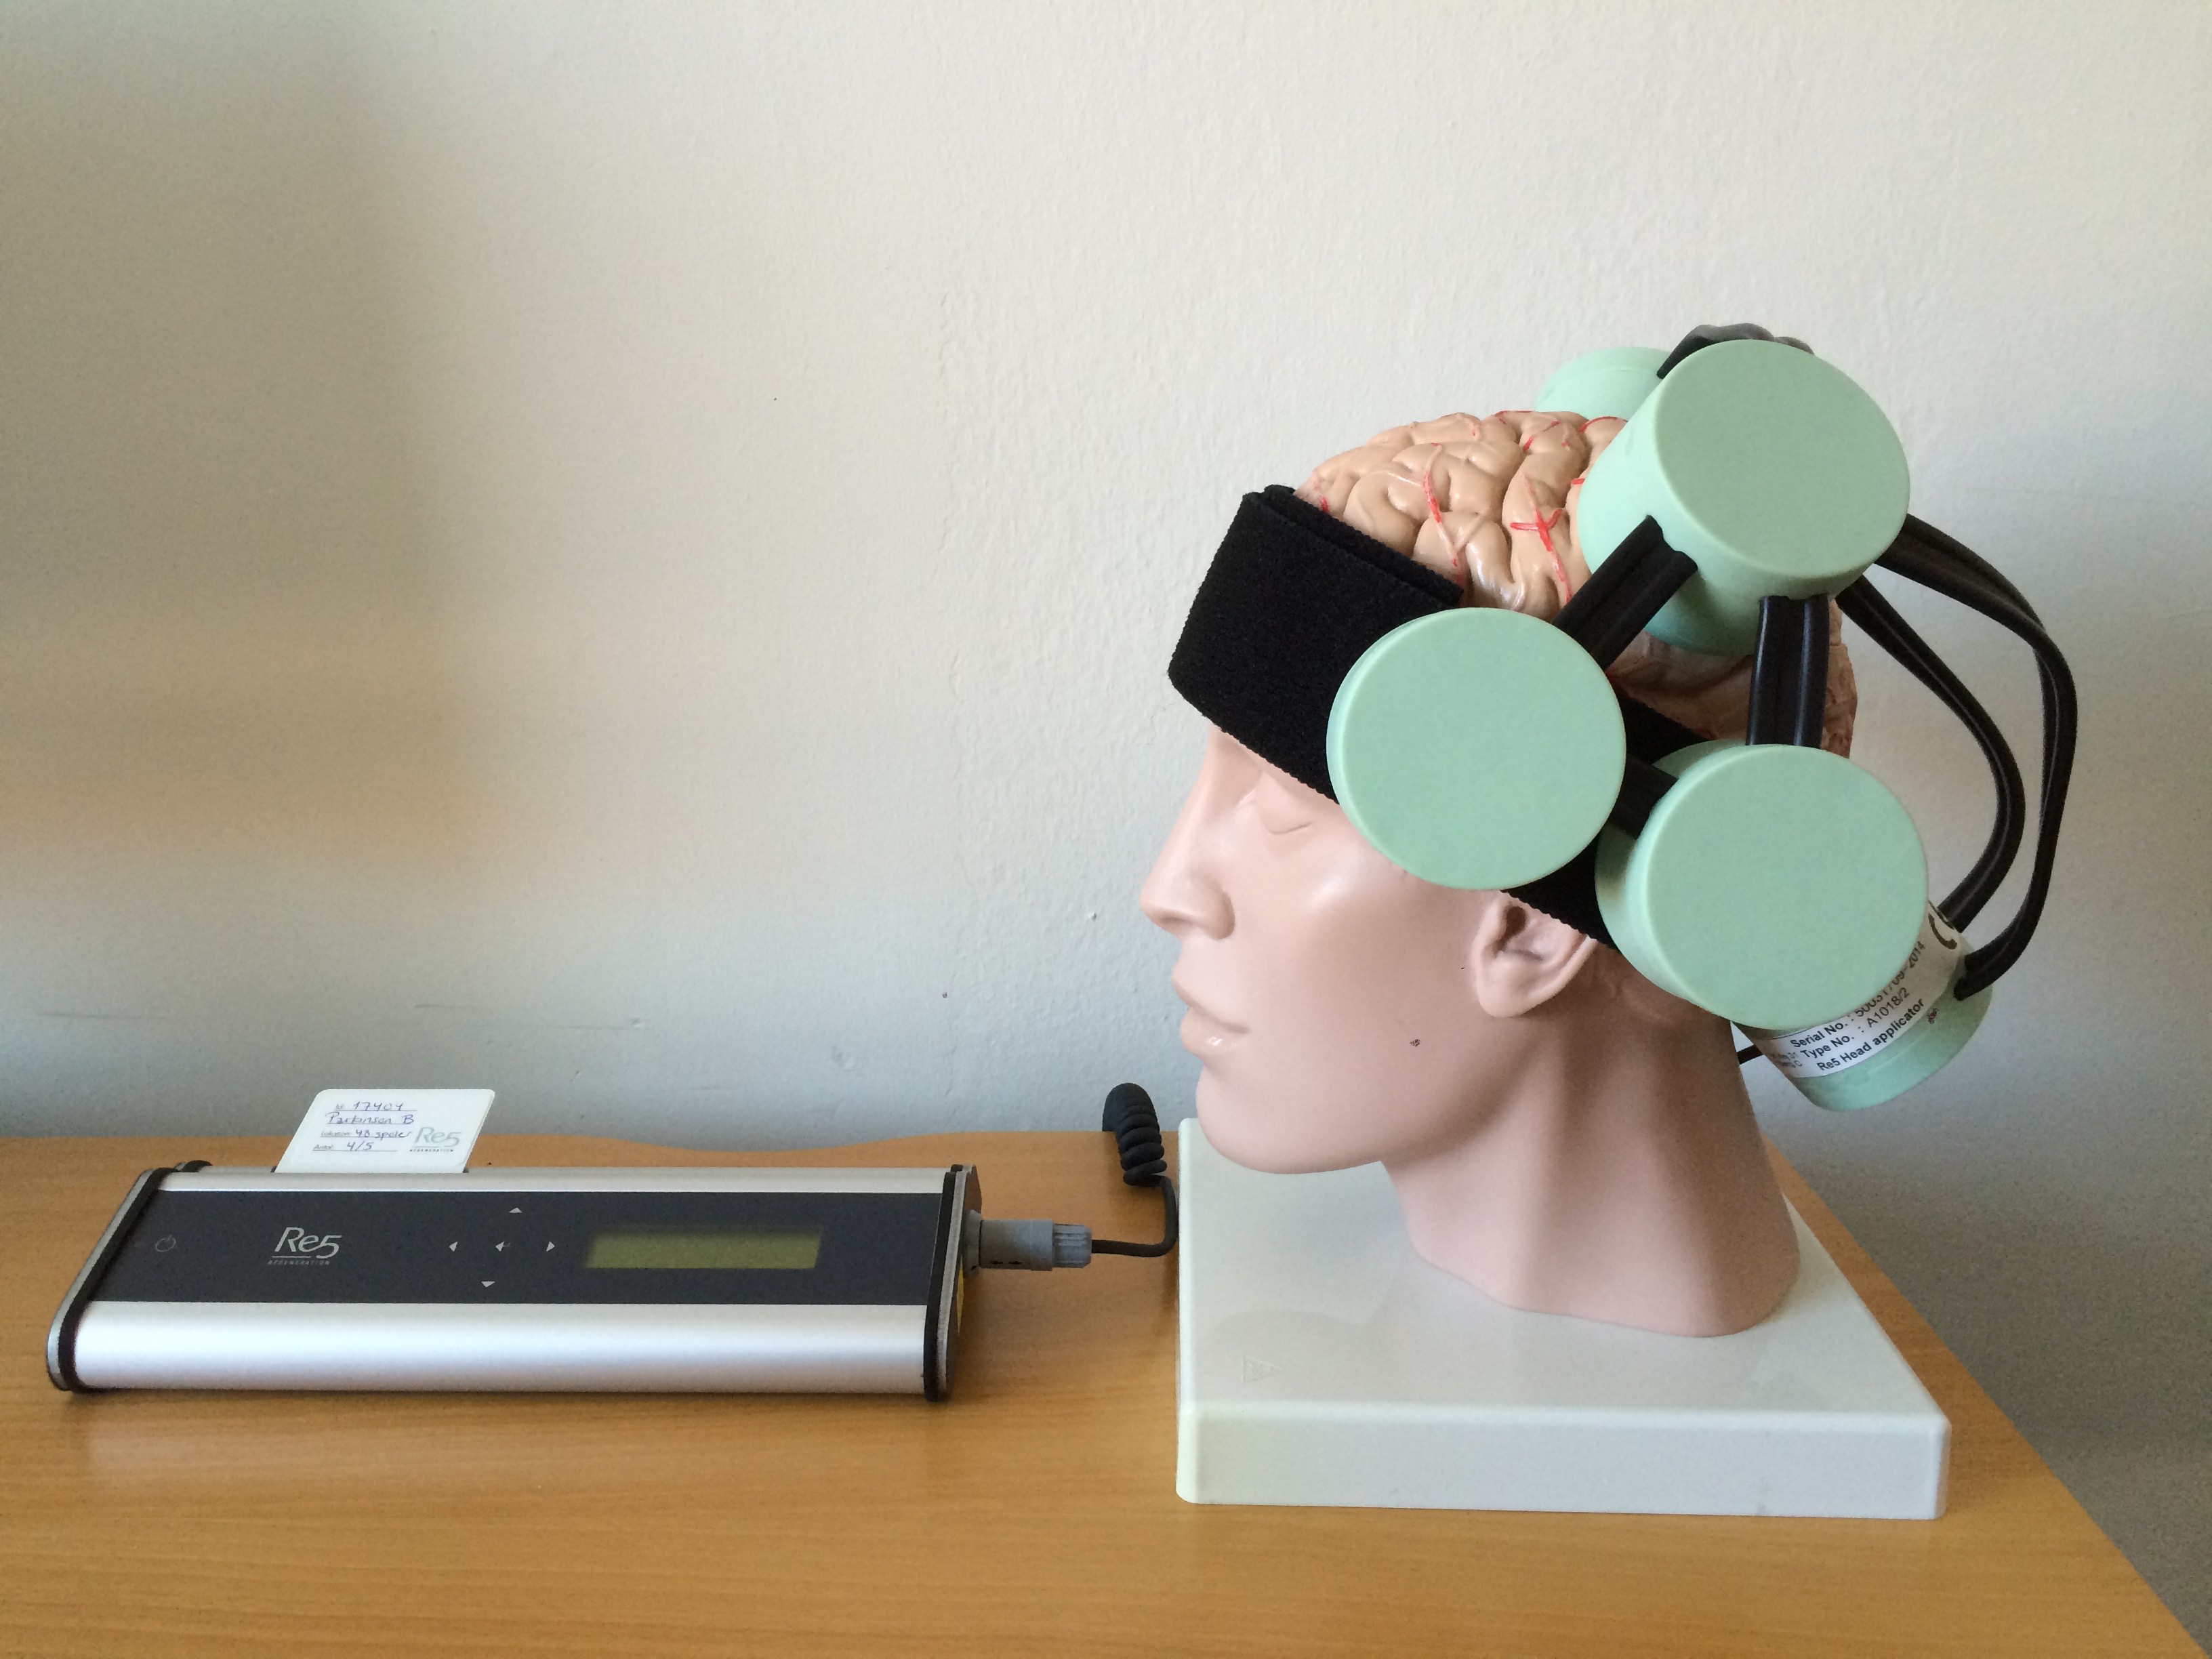


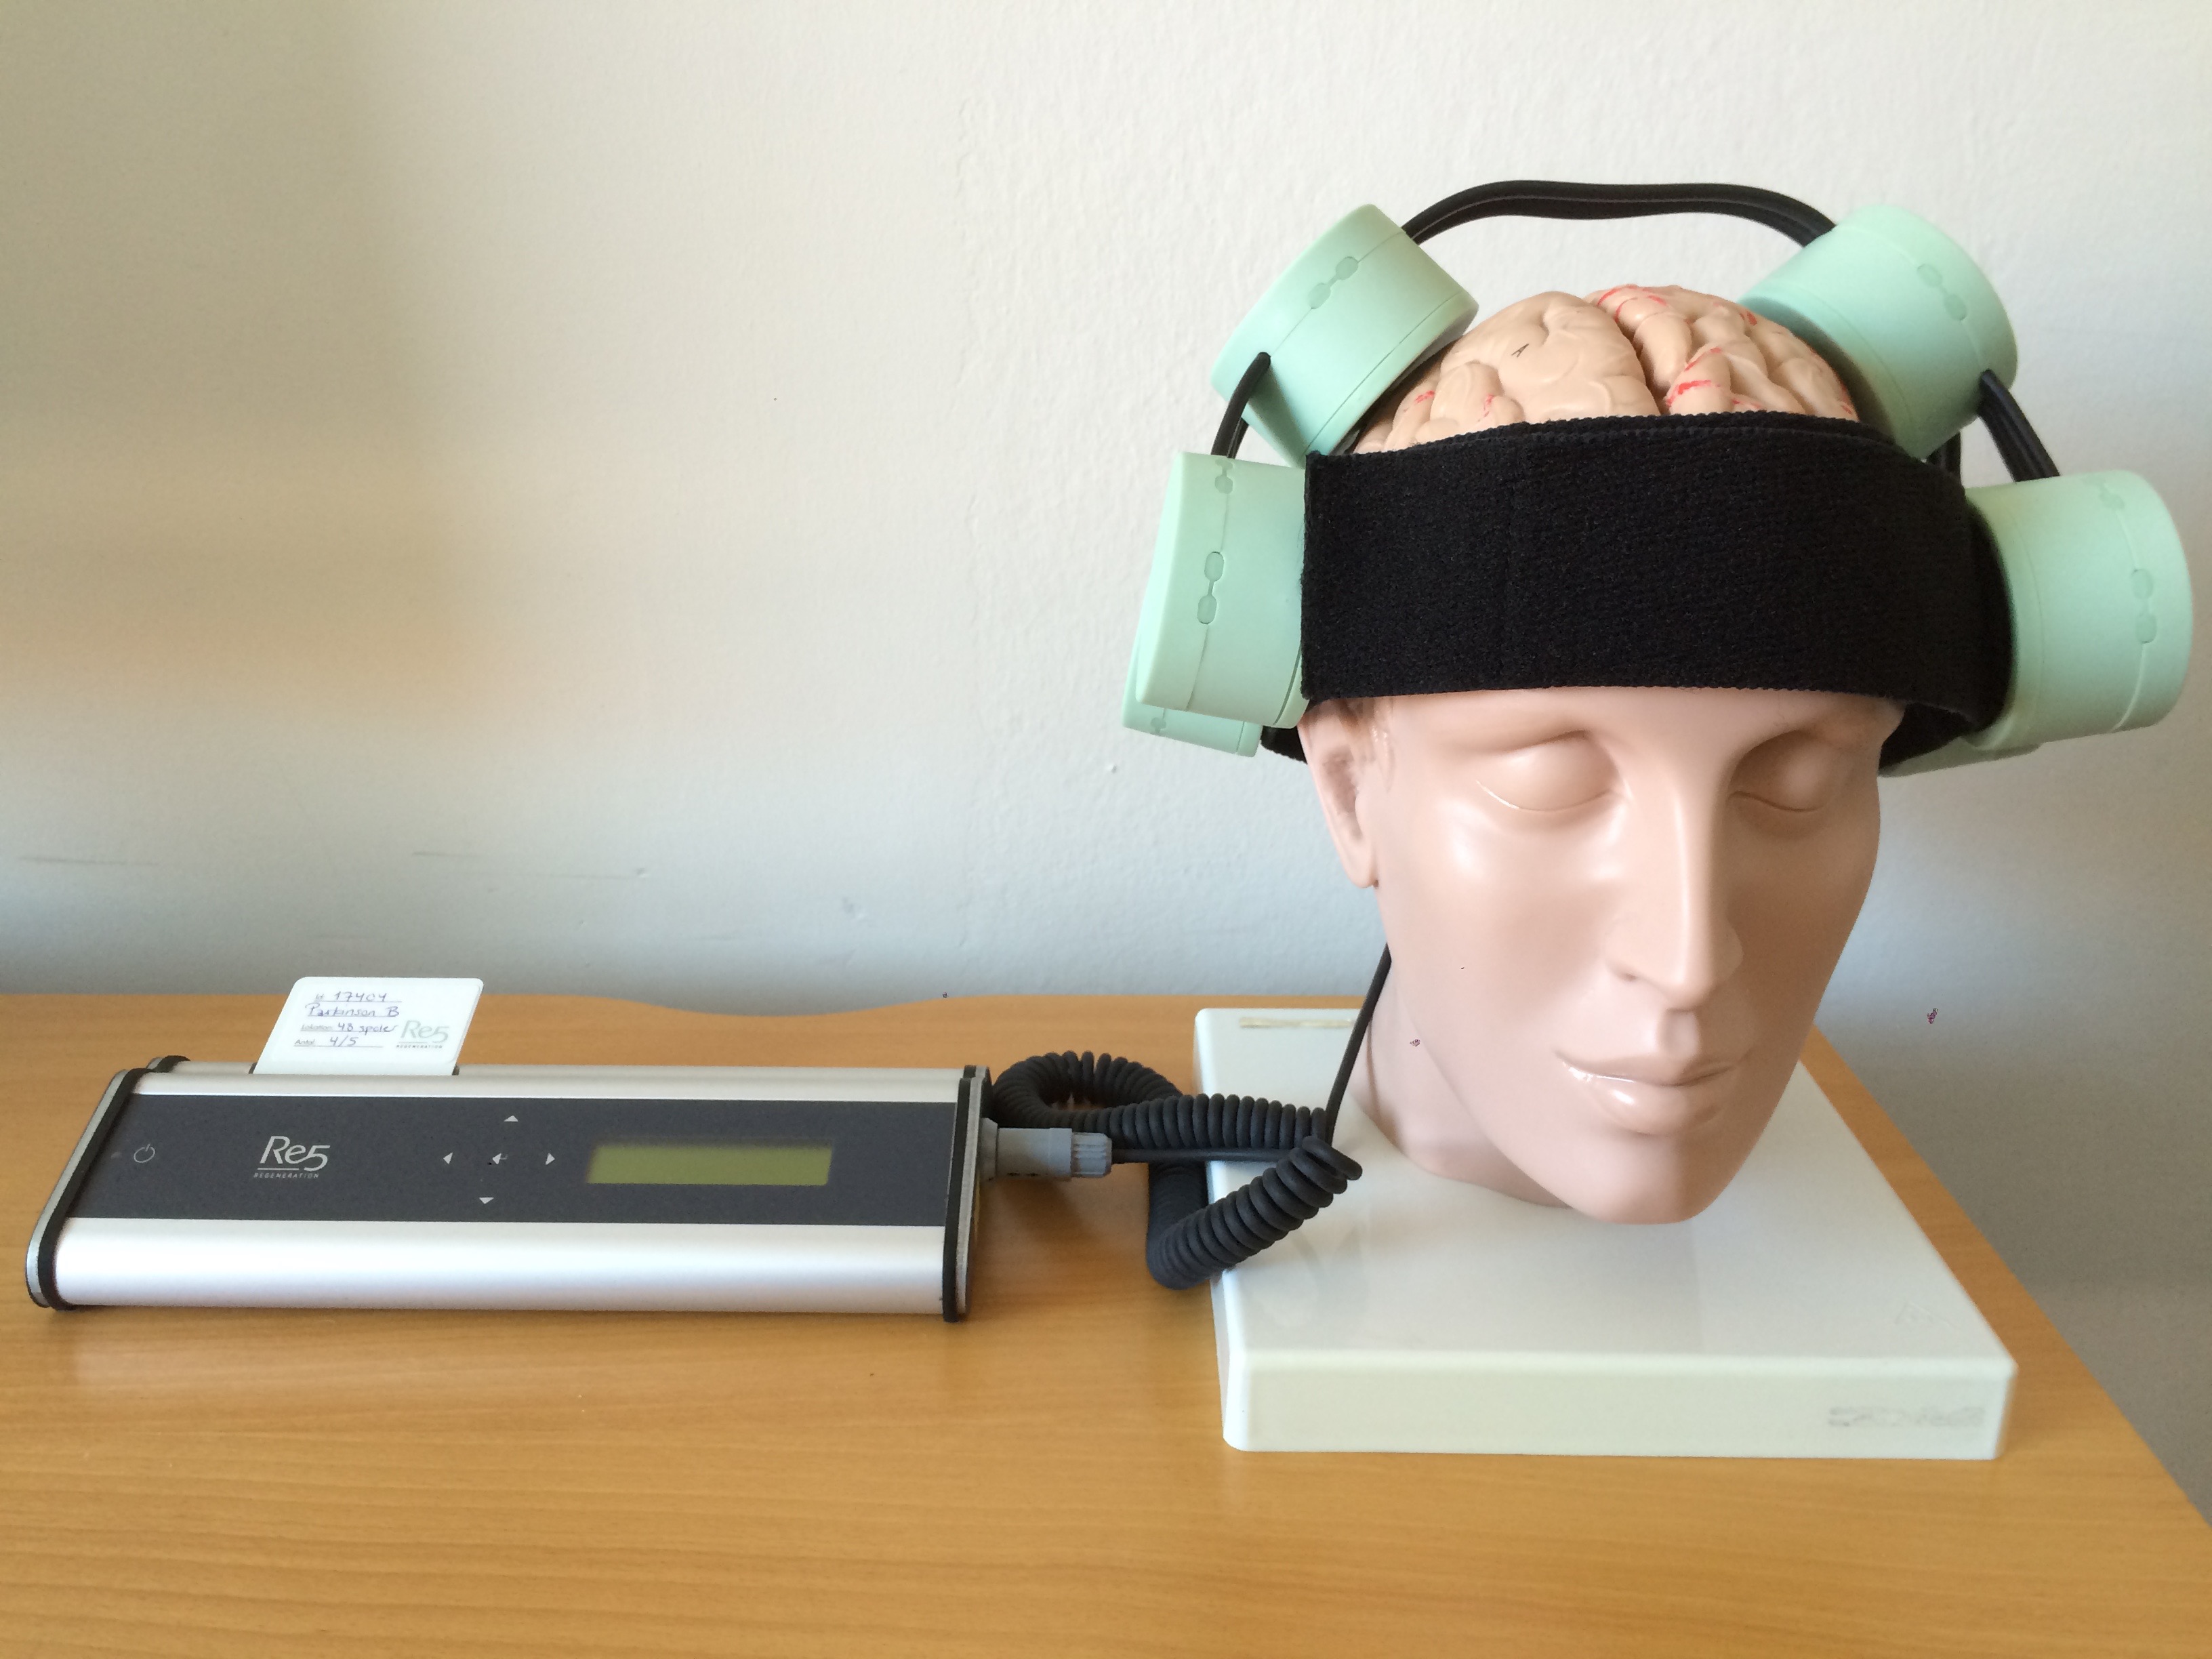

Supplement: Supplementary file 1 [file 14065796]
